# Supplementary material for: Flow cytometry-based rapid detection of Staphylococcus aureus and Pseudomonas aeruginosa using fluorescent antibodies
Source: Royal Society of Chemistry journal article supplement (doi:10.1039/d2ra05694a), 2022-01-01
Supplement: d2ra05694a1.pdf [file d2ra05694a1.pdf]

**(A) WKZ-1 + Recombinant antibody**

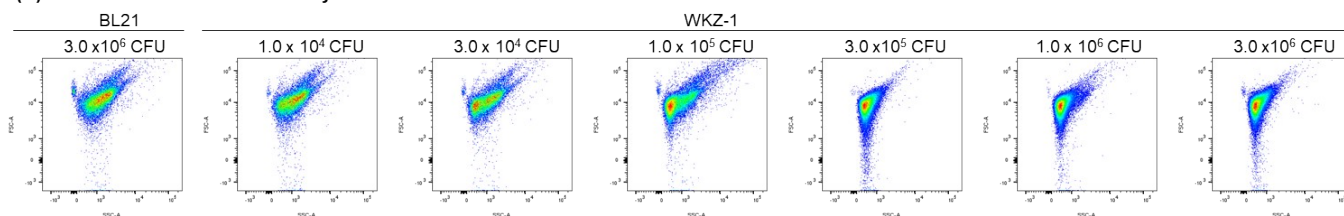

**(B) WKZ-1 + Commercial antibody**

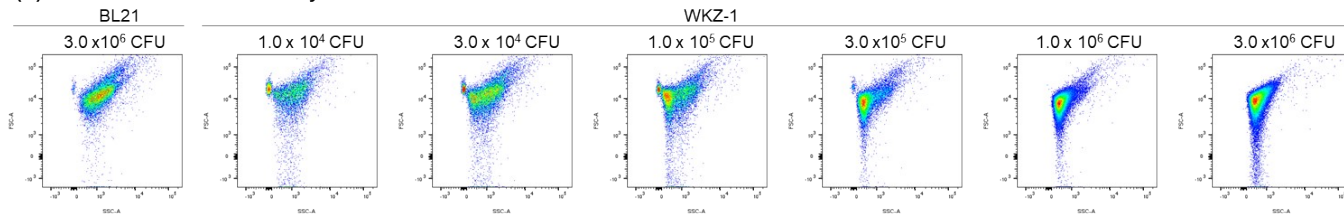

**(C) WKZ-2 + Recombinant antibody**

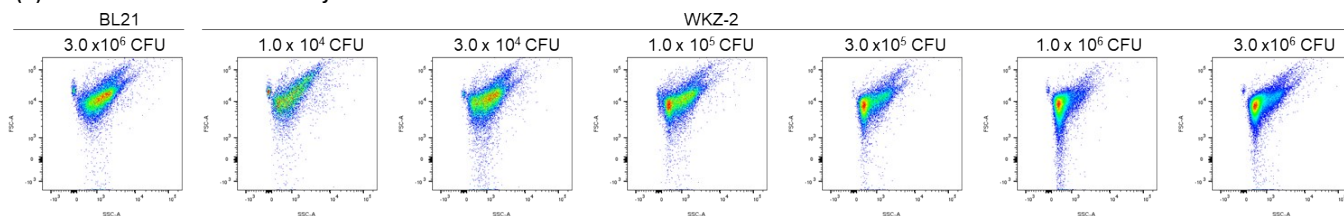

**(D) WKZ-2 + Commercial antibody**

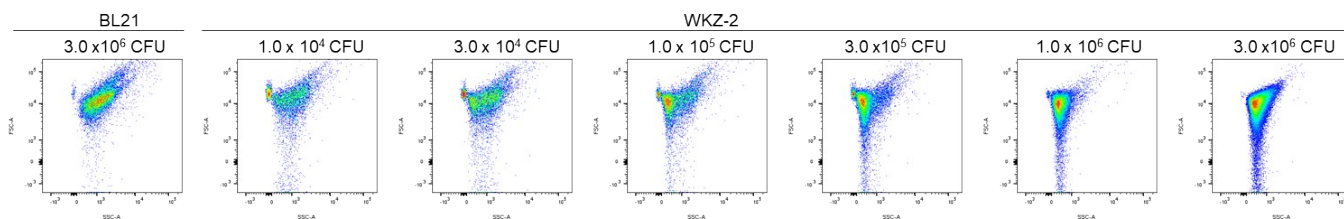

**Figure S1.** (A,B) Dot plots obtained by flow cytometry analysis after incubation of fluorescent recombinant (A) or commercial antibody (B) with different numbers of WKZ-1 and BL21. (C,D) Dot plots obtained by flow cytometry analysis after incubation of fluorescent recombinant (C) or commercial (D) antibody with different numbers of WKZ-2 and BL21.

**(A) UCBPP PA14 + Recombinant antibody**

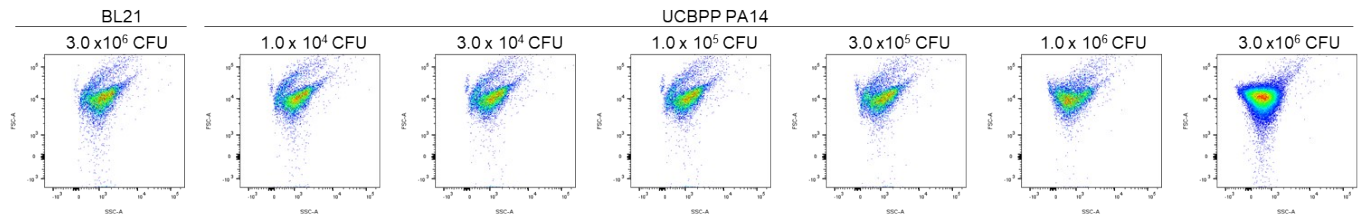

**(B) ATCC 27853 + Recombinant antibody**

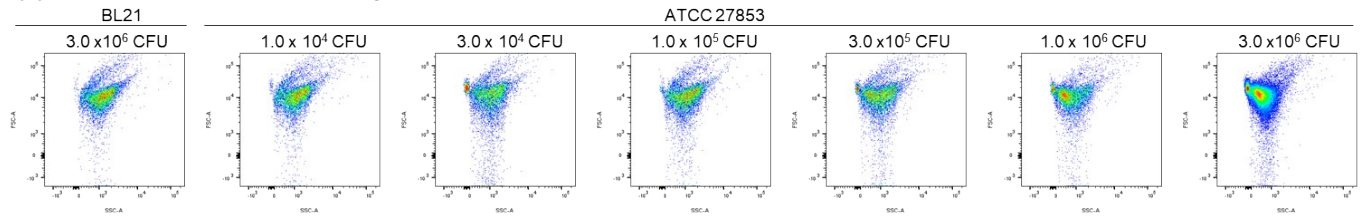

**(C) ATCC BAA-2108 + Recombinant antibody**

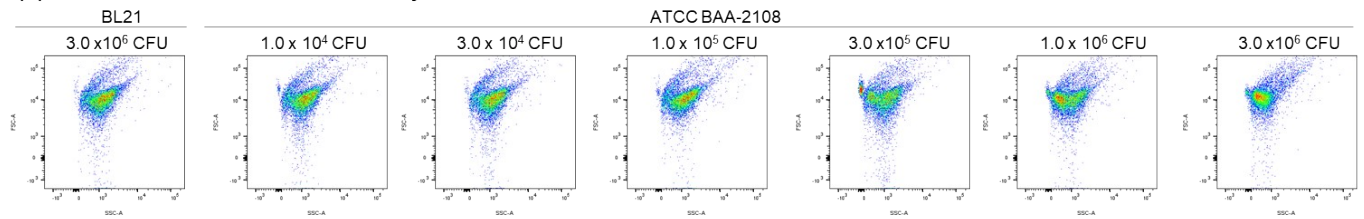

**Figure S2.** Dot plots obtained by flow cytometry analysis after incubating fluorescent recombinant antibody with different numbers of UCBPP PA14 (A), ATCC 27853 (B), or ATCC BAA-2108 (C).

**(A) UCBPP PA14 + Commercial antibody**

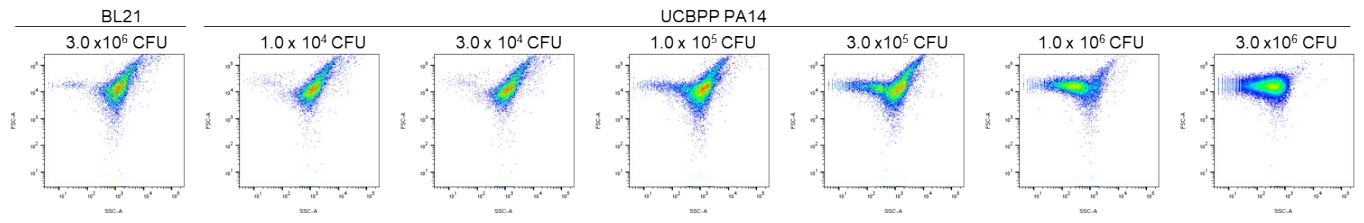

**(B) ATCC 27853 + Commercial antibody**

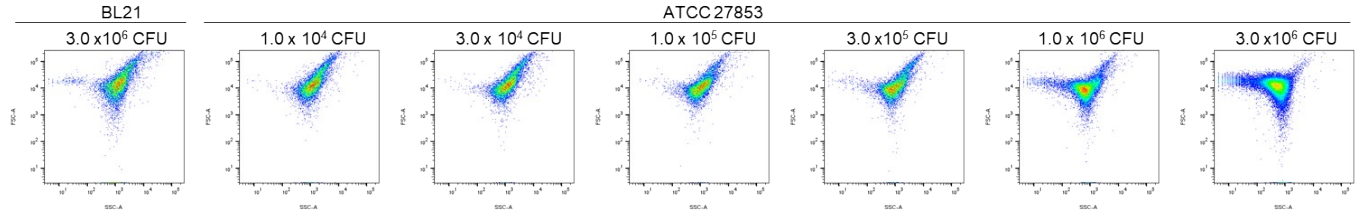

**(C) ATCC BAA-2108 + Commercial antibody**

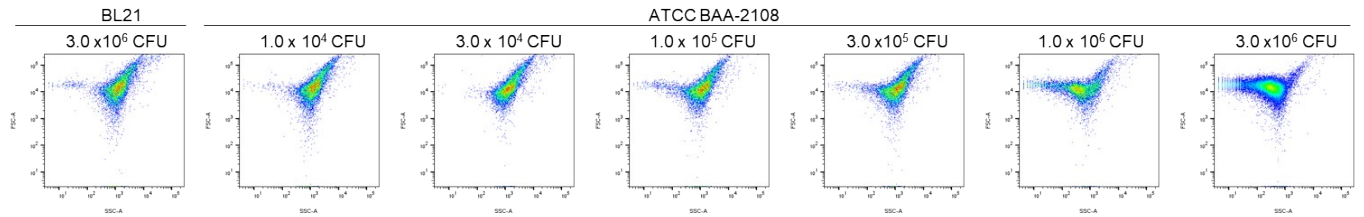

**Figure S3.** Dot plots obtained by flow cytometry analysis after incubating fluorescent commercial antibody with different numbers of UCBPP PA14 (A), ATCC 27853 (B), or ATCC BAA-2108 (C).

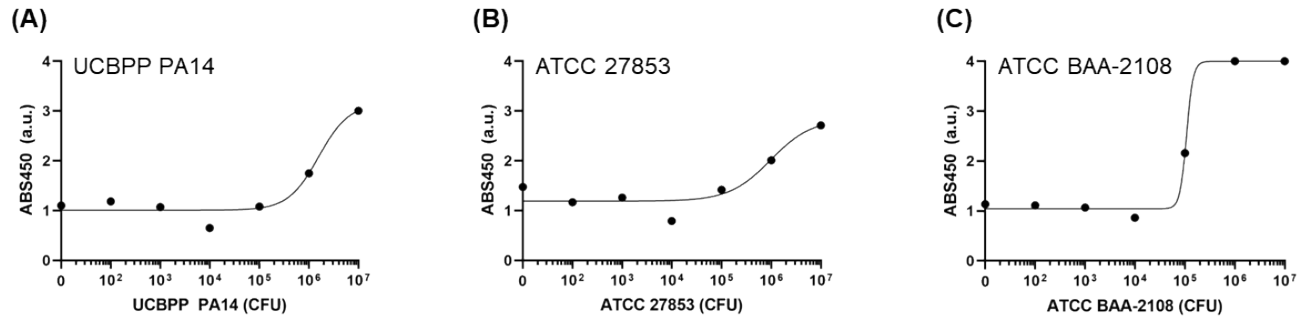

**Figure S4.** ELISA signals of recombinant scFv against UCBPP PA14 (A), ATCC 27853(B), or ATCC BAA-2108 (C).

**(A) UCBPP PA14 + Recombinant scFv**

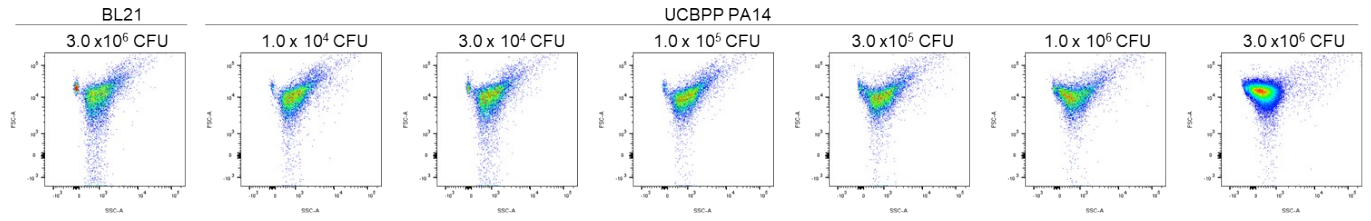

**(B) ATCC 27853 + Recombinant scFv**

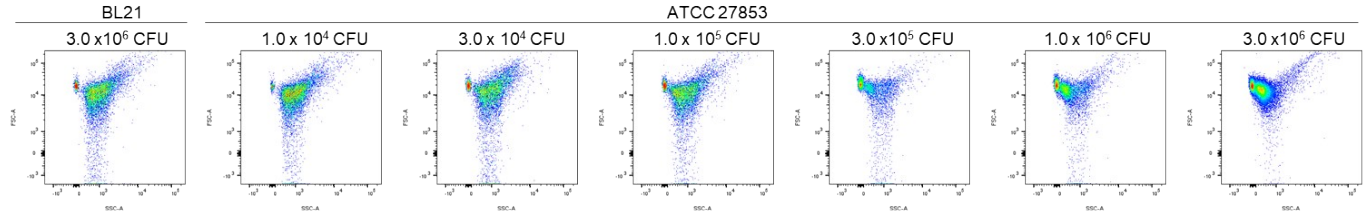

**(C) ATCC BAA-2108 + Recombinant scFv**

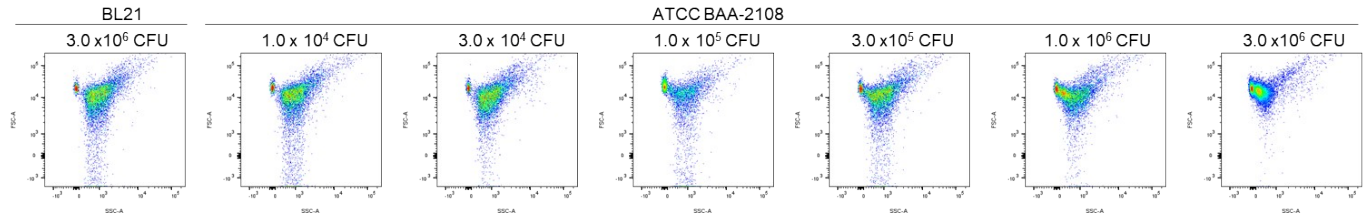

**Figure S5.** Dot plots obtained by flow cytometry analysis after incubating fluorescent recombinant scFv with different numbers of UCBPP PA14 (A), ATCC 27853 (B), or ATCC BAA-2108 (C).

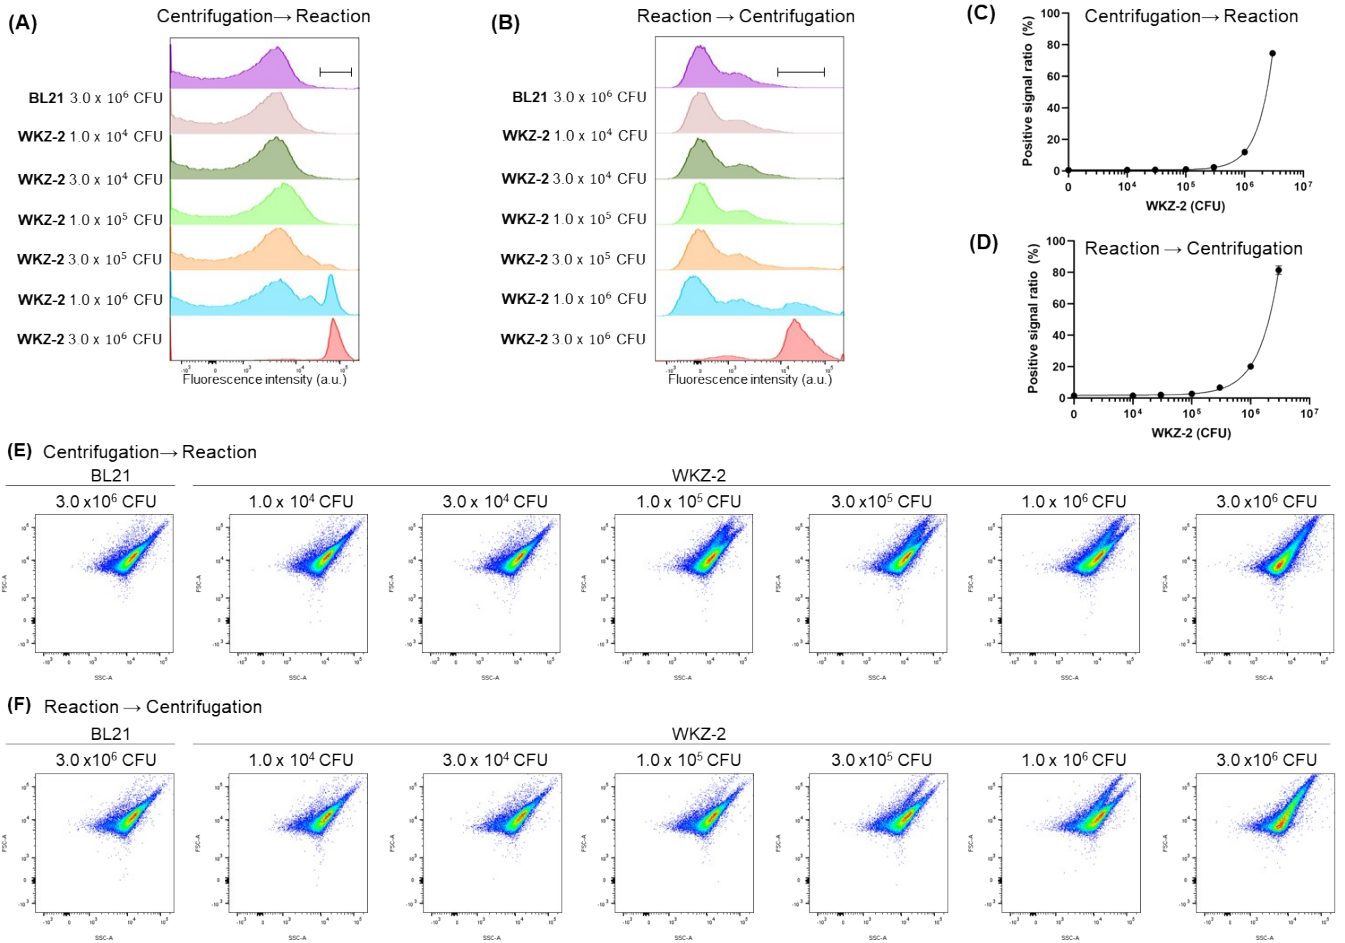

**Figure S6. (A,B)** Overlaying histograms obtained by flow cytometry analysis after incubation of fluorescent 6DW2 with different numbers of WKZ-2-included commercially available apple juice. Mock pathogenic apple juice sample was centrifuged and fluorescent dye-labeled 6DW2 was added to the pellet (A). Fluorescent 6DW2 was added to mock pathogenic apple juice, and the sample was centrifuged (B). **(C,D)** Positive signal ratio of the mean of fluorescence intensity of range-gated in each histogram. Error bars represent  $\pm 1$  SD ( $n = 3$ ). **(E,F)** Dot plots obtained by flow cytometry.
